# Supplementary material for: Multi-Level Control of the ATM/ATR-CHK1 Axis by the Transcription Factor E4F1 in Triple-Negative Breast Cancer
Source: MDPI journal article supplement (doi:10.3390/ijms23169217), 2022-08-16
Supplement: s1 [file s1]

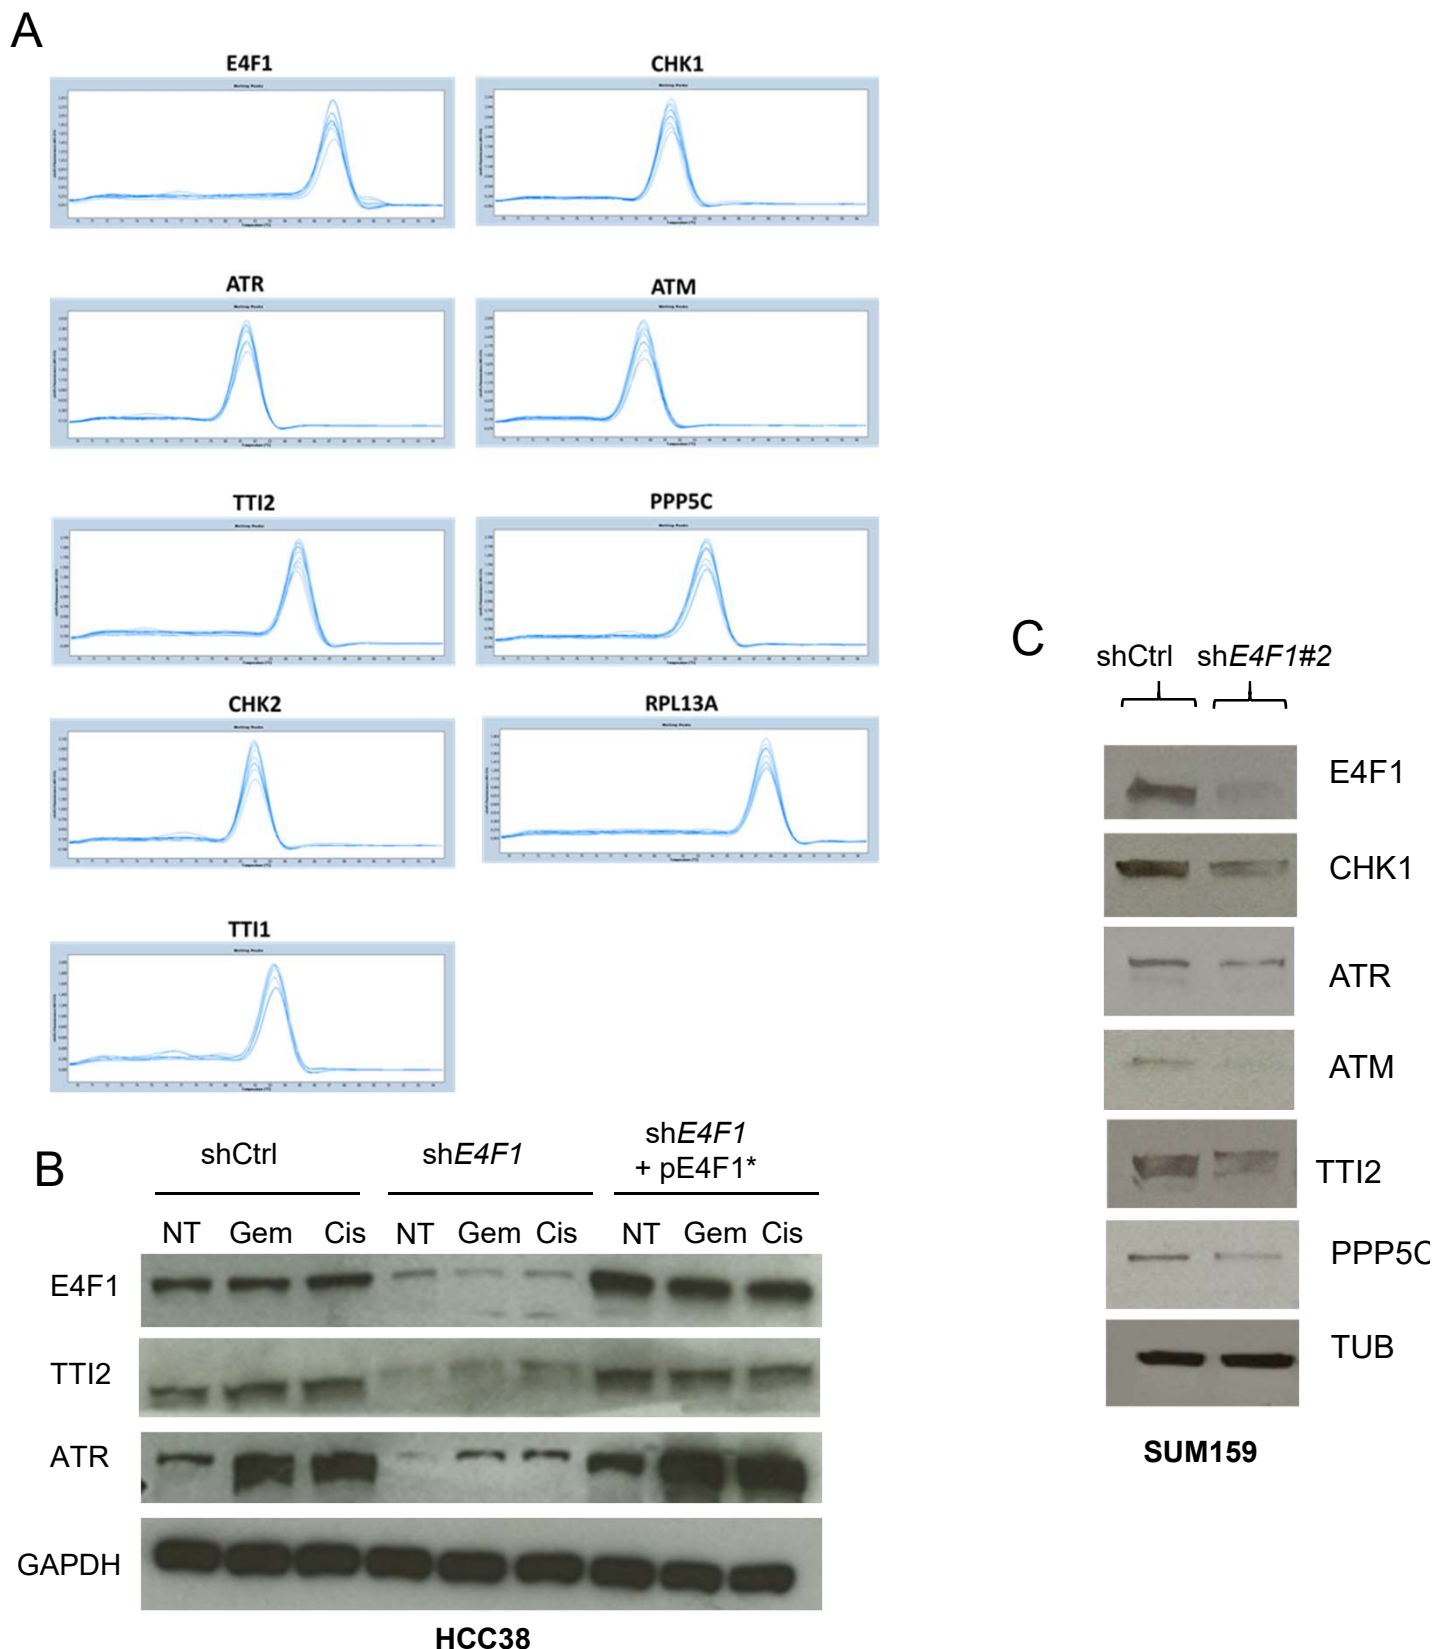

Figure S3: **A**- Melting curve analysis for the RT-qPCR validation experiments in SUM159. **B** - E4F1 depletion also impacts on TTI2 and ATR protein levels in HCC38 TNBC cells: ShRNA-mediated depletion of E4F1 in these cells results in a down-regulation of TTI2 and ATR protein levels in control (NT) as well as in cells treated with Gemcitabine (Gem) or Cisplatin (Cis). This down-regulation is reversed by the co-expression of the shRNA resistant pE4F1\* cDNA. **C**- Another shRNA (shE4F1#2) targeting *E4F1* mRNA in SUM159 TNBC cells also impact the protein levels of CHK1, ATR, ATM, TTI2 and PP5C
