# Supplementary material for: Multi-Level Control of the ATM/ATR-CHK1 Axis by the Transcription Factor E4F1 in Triple-Negative Breast Cancer
Source: MDPI journal article supplement (doi:10.3390/ijms23169217), 2022-08-16
Supplement: s1 [file s1]

**Supplementary Figure S2** *Batnini et al.*

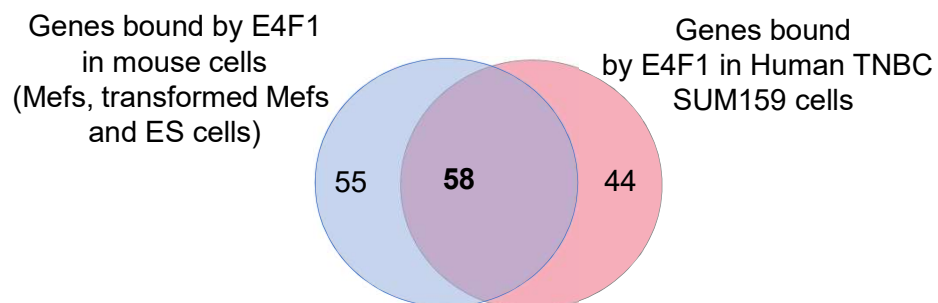

Figure S2: Overlap between all E4F1-bound human genes identified by ChIP-Seq in SUM159 cells and genes bound by E4F1 in mouse cells.
