# Supplementary material for: Multi-Level Control of the ATM/ATR-CHK1 Axis by the Transcription Factor E4F1 in Triple-Negative Breast Cancer
Source: MDPI journal article supplement (doi:10.3390/ijms23169217), 2022-08-16
Supplement: s1 [file s1]

Supplementary Figure S5 Batnini et al.

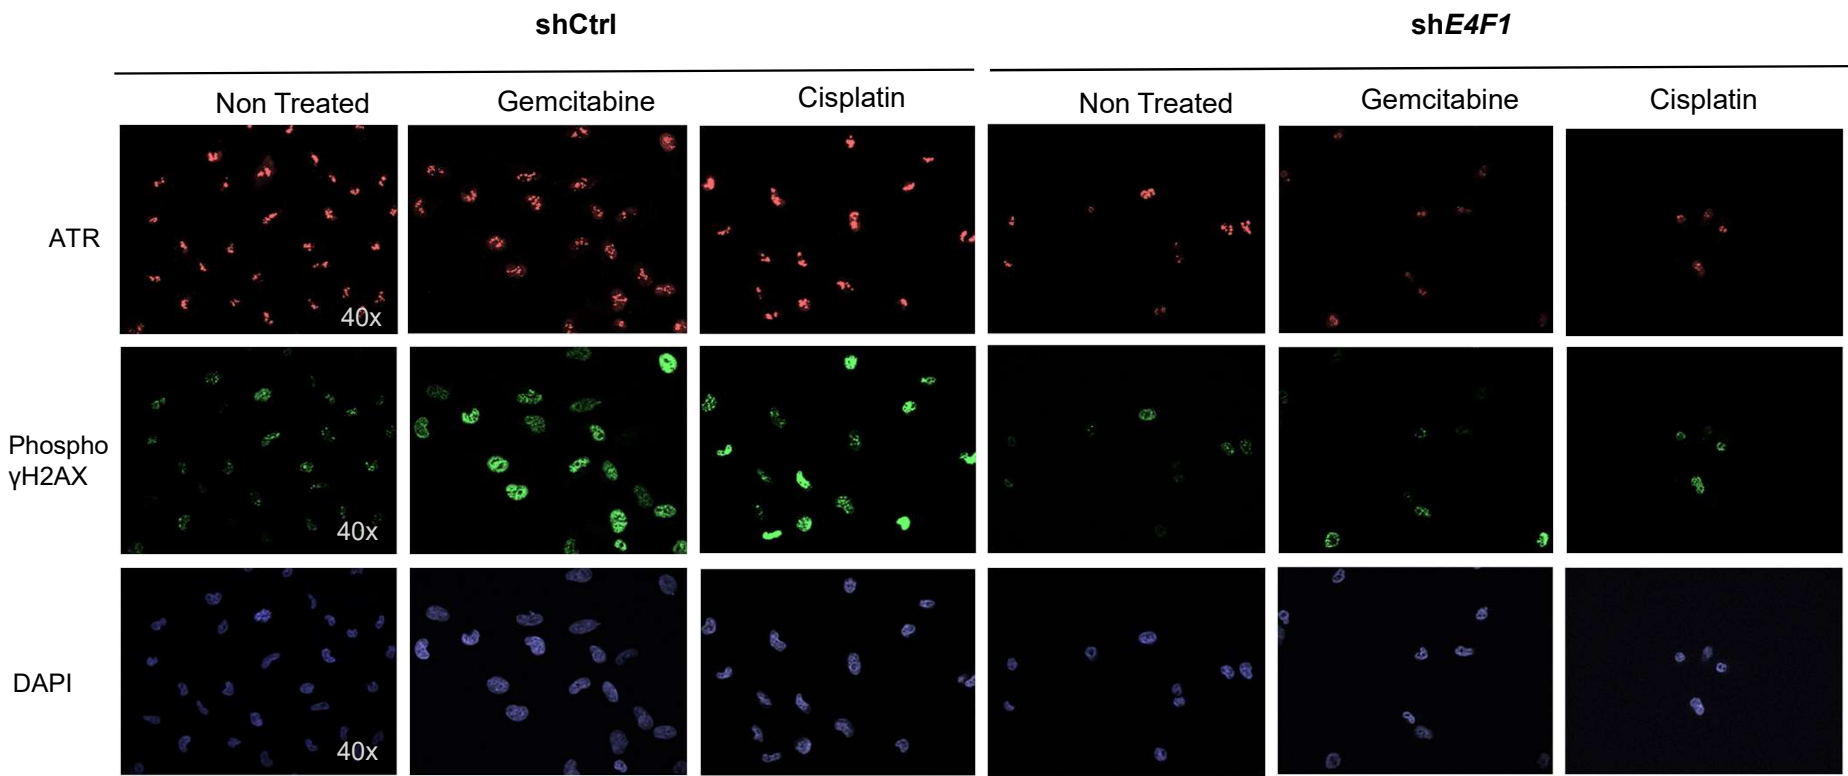

Figure S5: E4F1-depletion impacts on ATM/ATR – CHK1 signalling in response to chemotherapy drugs Gemcitabine and Cisplatin in SUM159 TNBC cells. - Immunofluorescence of DNA (blue) and of phospho S139- γH2AX (green) and ATR (Red) in SUM159 cells transduced with either control shRNA (shCtrl) or shE4F1 and upon antibiotics selection, treated for 24h with Gemcitabine or Cisplatin.
