# Supplementary material for: Multi-Level Control of the ATM/ATR-CHK1 Axis by the Transcription Factor E4F1 in Triple-Negative Breast Cancer
Source: MDPI journal article supplement (doi:10.3390/ijms23169217), 2022-08-16
Supplement: s1 [file s1]

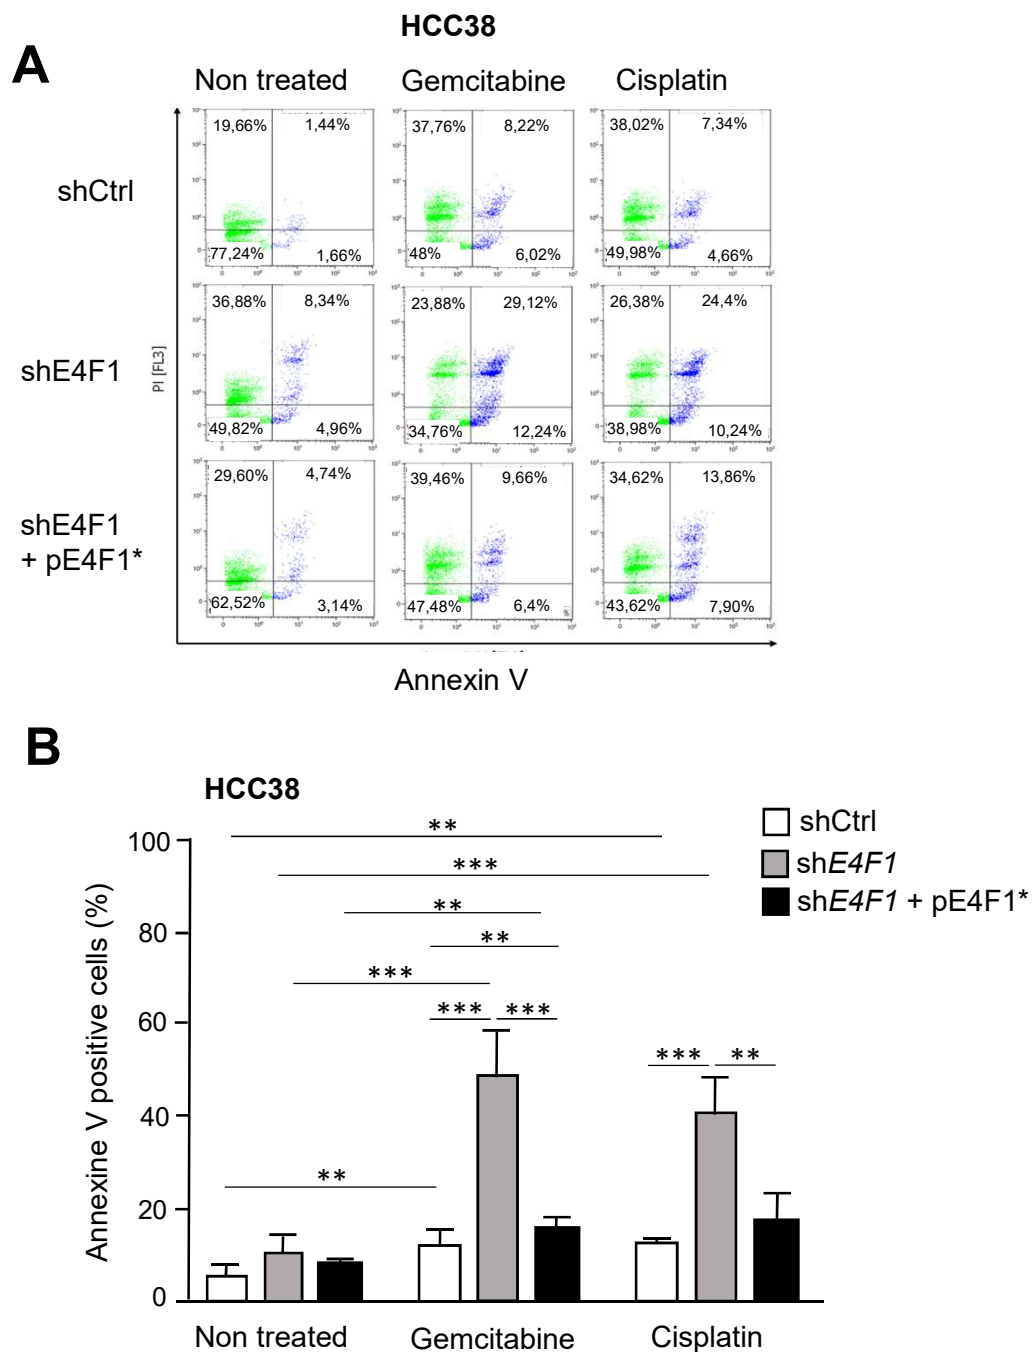

Figure S1: Depletion of the transcription factor E4F1 sensitizes HCC38 Human Triple Negative Breast Cancer (TNBC) cell line to the chemotherapy drugs Gemcitabine and Cisplatin. shRNA-mediated depletion of E4F1 sensitizes TNBC HCC38 cells to chemotherapy drugs (Cytotoxic effect), an effect rescued by the co-expression of the shE4F1-resistant pE4F1\* construct. Three days after shCtrl, shE4F1 or shE4F1 + pE4F1\* transduction, cells were exposed to sub-lethal doses of Gemcitabine (180 nM, IC<sub>30</sub>) or Cisplatin (950nM, IC<sub>30</sub>) for 24 hours and assessed for cell death by ) Flow cytometry analysis for apoptosis /necrosis by staining dying cells with annexin V/7-AAD and propidium Iodide (PI). (A) Representative flow cytometry profile of annexin V/7-AAD / PI -positive cells, and (B) quantitation (FlowJo software) of three independent experiments expressed as mean values  $\pm$  SD of three independent experiments. \*\*  $p < 0.01$ , \*\*\*  $p < 0.001$  as determined by a one way ANOVA test.
