# Supplementary material for: Multi-Level Control of the ATM/ATR-CHK1 Axis by the Transcription Factor E4F1 in Triple-Negative Breast Cancer
Source: MDPI journal article supplement (doi:10.3390/ijms23169217), 2022-08-16
Supplement: s1 [file s1]

**Supplementary Figure S4** *Batnini et al.*

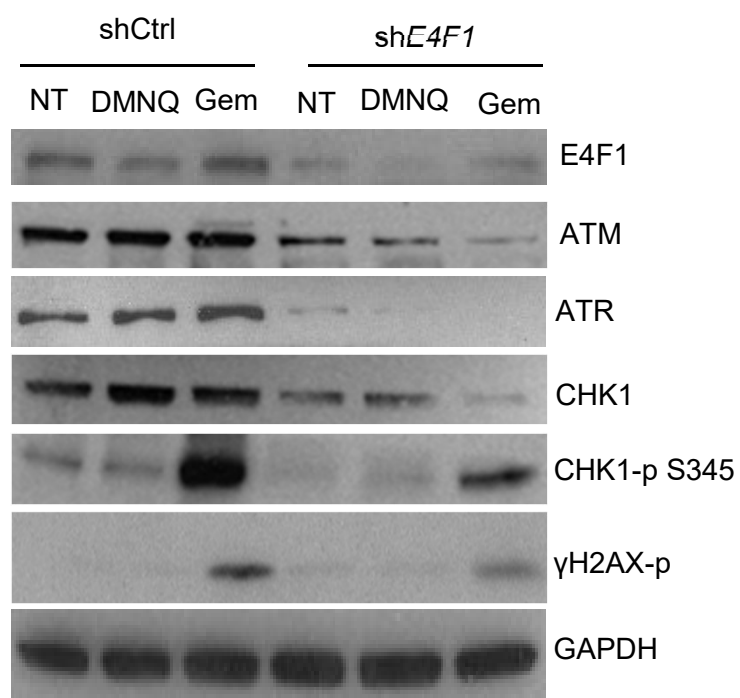

Figure S4: E4F1-depletion in SUM159 impacts on the ATM/ATR-mediated phosphorylation of YH2AX in response to oxidative stress drug, DMNQ and chemotherapy drug Gemcitabine.
