# Supplementary material for: Multi-Level Control of the ATM/ATR-CHK1 Axis by the Transcription Factor E4F1 in Triple-Negative Breast Cancer
Source: Int J Mol Sci. 2022 Aug 16;23(16):9217. doi: 10.3390/ijms23169217 (PMC9409040; doi:10.3390/ijms23169217)
Supplement: Supplementary file 1 [file ijms-23-09217-s001.zip › Supplementary Table S1.xlsx]

## Sheet: Feuil1
# HOMER Peaks
# Peak finding parameters:
# tag directory = Combined-IP_NTAC
#
# total peaks = 116
# peak size = 161
# peaks found using tags on both strands
# minimum distance between peaks = 322
# fragment length = 150
# genome size = 2000000000
# Total tags = 125564020.0
# Total tags in peaks = 9234.0
# Approximate IP efficiency = 0.01%
# tags per bp = 0.062516
# expected tags per peak = 10.065
# maximum tags considered per bp = 6.0
# effective number of tags used for normalization = 10000000.0
# Peaks have been centered at maximum tag pile-up
# FDR rate threshold = 0.001000000
# FDR effective poisson threshold = 2.865281e-07
# FDR tag threshold = 30.0
# number of putative peaks = 11050
#
# input tag directory = Combined-Inp_NTAC
# Fold over input required = 4.00
# Poisson p-value over input required = 1.00e-04
# Putative peaks filtered by input = 10877
#
# size of region used for local filtering = 10000
# Fold over local region required = 4.00
# Poisson p-value over local region required = 1.00e-04
# Putative peaks filtered by local signal = 57
#
# Maximum fold under expected unique positions for tags = 2.00
# Putative peaks filtered for being too clonal = 0
#
# cmd = findPeaks Combined-IP_NTAC -style factor -o ../peaks-B/Sum159ChIPE4F1-B-Ctrl.txt -i Combined-Inp_NTAC
#
# Column Headers:
#PeakID	chr	start	end	strand	Normalized Tag Count	focus ratio	findPeaks Score	Total Tags (normalized to Control Experiment)	Control Tags	Fold Change vs Control	p-value vs Control	Fold Change vs Local	p-value vs Local	Clonal Fold Change
chr1-16	chr1	209827849	209828009	+	14.2	0.907	179.000000	166.0	15.0	11.07	6.36e-110	22.34	1.64e-168	0.86
chr4-15	chr4	6640564	6640724	+	14.0	0.908	177.000000	164.2	15.0	10.94	7.75e-108	23.08	4.89e-169	0.80
chr20-17	chr20	37693925	37694085	+	12.7	0.863	165.000000	149.2	15.0	9.95	1.54e-92	18.54	1.62e-138	0.84
chr15-1	chr15	51971744	51971904	+	12.6	0.865	160.000000	147.4	19.0	7.76	3.53e-77	24.57	4.61e-156	0.82
chr17-7	chr17	7329353	7329513	+	12.6	0.770	160.000000	147.4	11.0	13.40	1.27e-108	21.99	8.59e-149	0.84
chr3-3	chr3	52685868	52686028	+	12.2	0.947	153.000000	142.7	14.0	10.19	1.92e-89	19.56	9.97e-137	0.84
chr15-2	chr15	100602332	100602492	+	12.0	0.864	151.000000	140.9	16.0	8.80	3.56e-80	16.90	6.63e-126	0.80
chr16-39	chr16	740956	741116	+	12.0	0.876	152.000000	140.9	7.0	20.12	1.47e-126	24.87	5.20e-150	0.87
chr2-28	chr2	85561495	85561655	+	11.6	0.844	149.000000	136.2	19.0	7.17	1.45e-67	13.76	7.09e-109	0.87
chr20-23	chr20	46089934	46090094	+	11.6	0.940	146.000000	136.2	15.0	9.08	8.34e-80	17.63	2.46e-124	0.80
chr3-4	chr3	12484380	12484540	+	11.4	0.870	144.000000	134.3	24.0	5.60	2.04e-54	16.04	1.72e-115	0.93
chr10-25	chr10	103367829	103367989	+	11.1	0.874	142.000000	130.6	22.0	5.94	1.70e-55	24.87	3.20e-139	0.83
chr4-20	chr4	87422489	87422649	+	11.1	0.851	139.000000	129.7	19.0	6.82	1.20e-61	17.30	2.20e-117	0.85
chr5-573	chr5	140700330	140700490	+	10.7	0.892	134.000000	125.0	24.0	5.21	4.34e-47	12.74	3.20e-95	0.82
chr1-24	chr1	85708414	85708574	+	10.4	0.814	133.000000	122.2	11.0	11.11	2.08e-81	15.92	1.69e-105	0.85
chr16-44	chr16	10944446	10944606	+	10.3	0.877	132.000000	120.3	5.0	24.07	7.90e-118	13.98	6.79e-98	0.86
chr9-1	chr9	105558035	105558195	+	10.0	0.861	128.000000	117.5	17.0	6.91	1.12e-56	14.12	1.98e-95	0.83
chr4-24	chr4	6709832	6709992	+	9.96	0.856	127.000000	116.6	15.0	7.77	2.76e-61	12.65	6.80e-90	0.91
chr11-1	chr11	125625831	125625991	+	9.96	0.871	127.000000	116.6	12.0	9.72	3.09e-71	16.53	1.92e-103	0.87
chr1-28	chr1	101025744	101025904	+	9.72	0.855	122.000000	113.8	14.0	8.13	1.38e-61	14.37	4.91e-94	0.85
chr11-2	chr11	62573829	62573989	+	9.48	0.804	122.000000	111.9	16.0	7.00	3.38e-54	13.68	1.07e-88	0.93
chr1-30	chr1	220046601	220046761	+	9.32	0.922	118.000000	109.1	10.0	10.91	3.46e-72	19.12	6.54e-104	0.88
chr10-39	chr10	118754924	118755084	+	9.32	0.846	120.000000	109.1	14.0	7.80	5.59e-58	15.21	5.61e-93	0.91
chr2-30	chr2	101252797	101252957	+	9.24	0.932	120.000000	109.1	12.0	9.09	2.04e-64	16.84	5.37e-97	0.86
chr7-5	chr7	149838280	149838440	+	9.24	0.882	118.000000	109.1	23.0	4.75	2.41e-38	12.50	5.02e-83	0.91
chr9-2	chr9	113221247	113221407	+	9.08	0.830	116.000000	106.3	11.0	9.67	3.96e-65	13.69	9.07e-86	0.89
chr19-1	chr19	16542405	16542565	+	9.00	0.845	115.000000	105.4	20.0	5.27	9.53e-41	15.84	1.03e-91	0.87
chr6-3	chr6	26596875	26597035	+	8.76	0.881	112.000000	102.6	17.0	6.04	1.65e-44	13.86	2.20e-83	0.89
chr20-31	chr20	6005977	6006137	+	8.68	0.914	110.000000	101.7	20.0	5.08	6.89e-38	14.77	1.92e-85	0.87
chr7-8	chr7	22822784	22822944	+	8.60	0.857	108.000000	100.7	20.0	5.04	3.49e-37	13.81	9.77e-82	0.88
chr7-9	chr7	155644332	155644492	+	8.60	0.840	108.000000	100.7	15.0	6.72	1.56e-47	13.25	5.91e-80	0.88
chr17-12	chr17	4796052	4796212	+	8.60	0.837	110.000000	100.7	18.0	5.60	6.68e-41	18.72	2.08e-93	0.85
chr14-1	chr14	35809243	35809403	+	8.52	0.919	108.000000	99.8	19.0	5.25	2.93e-38	17.65	7.64e-91	0.85
chr11-3	chr11	86245018	86245178	+	8.36	0.796	108.000000	98.9	6.0	16.48	5.08e-81	11.39	9.00e-71	0.96
chr16-51	chr16	2223518	2223678	+	8.28	0.892	104.000000	97.0	20.0	4.85	4.26e-35	18.04	3.08e-89	0.92
chr1-40	chr1	88684147	88684307	+	8.20	0.884	104.000000	96.1	12.0	8.01	2.82e-52	14.57	2.81e-80	0.86
chr3-5	chr3	180989659	180989819	+	7.96	0.838	106.000000	93.3	16.0	5.83	1.13e-39	12.01	3.23e-70	0.90
chr22-1	chr22	36529168	36529328	+	7.88	0.804	103.000000	92.3	9.0	10.26	6.78e-59	12.27	2.13e-70	0.91
chr1-42	chr1	77219374	77219534	+	7.80	0.892	99.000000	91.4	13.0	7.03	4.55e-45	12.27	5.12e-69	0.90
chr6-4	chr6	112087479	112087639	+	7.80	0.840	100.000000	91.4	11.0	8.31	8.20e-51	11.17	4.73e-66	0.90
chr10-51	chr10	45972360	45972520	+	7.80	0.849	100.000000	91.4	11.0	8.31	8.20e-51	24.44	2.51e-97	1.04
chr13-13	chr13	26253997	26254157	+	7.65	0.748	97.000000	90.5	11.0	8.23	6.79e-50	11.55	5.34e-66	0.83
chr12-2	chr12	949748	949908	+	7.57	0.817	97.000000	88.6	11.0	8.06	4.51e-48	13.21	1.07e-69	0.89
chr2-39	chr2	3575082	3575242	+	7.49	0.907	96.000000	87.7	14.0	6.26	2.42e-39	11.70	3.79e-65	0.89
chr8-1633	chr8	28093034	28093194	+	7.49	0.807	95.000000	87.7	14.0	6.26	2.42e-39	11.07	4.43e-63	0.89
chr16-53	chr16	85799495	85799655	+	7.49	0.880	94.000000	87.7	11.0	7.97	3.61e-47	10.50	3.93e-61	0.91
chr6-5	chr6	107459505	107459665	+	7.25	0.800	92.000000	84.9	15.0	5.66	6.93e-35	12.33	4.93e-65	0.94
chr16-54	chr16	47461116	47461276	+	7.01	0.797	92.000000	83.0	7.0	11.86	3.51e-58	10.15	3.69e-56	0.92
chr2-40	chr2	223957342	223957502	+	6.93	0.904	88.000000	82.1	9.0	9.12	5.15e-49	10.70	2.38e-57	0.96
chr8-1637	chr8	33513086	33513246	+	6.93	0.839	87.000000	81.2	20.0	4.06	1.14e-24	13.49	2.11e-65	0.92
chr10-60	chr10	73247253	73247413	+	6.61	0.909	85.000000	78.4	9.0	8.71	3.32e-45	9.36	1.88e-50	0.91
chr7-13	chr7	726572	726732	+	6.53	0.926	85.000000	76.5	14.0	5.46	6.87e-31	7.10	3.24e-41	0.90
chr1-55	chr1	11926391	11926551	+	6.45	0.913	82.000000	75.6	15.0	5.04	2.47e-28	15.52	1.35e-65	0.99
chr20-35	chr20	58651107	58651267	+	6.45	0.895	84.000000	75.6	4.0	18.89	1.11e-66	11.26	1.62e-54	0.95
chr15-4	chr15	72118279	72118439	+	6.37	0.816	81.000000	74.6	12.0	6.22	1.60e-33	9.14	5.90e-48	0.92
chr1-59	chr1	160262457	160262617	+	6.29	0.804	79.000000	73.7	12.0	6.14	9.89e-33	9.48	1.61e-48	0.90
chr4-46	chr4	6673948	6674108	+	6.21	0.888	79.000000	72.8	10.0	7.28	8.59e-37	10.48	5.79e-51	0.90
chr4-45	chr4	141220830	141220990	+	6.13	0.843	81.000000	71.8	13.0	5.53	3.99e-29	10.10	3.20e-49	0.93
chr10-64	chr10	49941927	49942087	+	6.13	0.832	80.000000	71.8	8.0	8.98	5.84e-42	18.53	4.98e-68	0.96
chr11-8	chr11	68903790	68903950	+	6.13	0.900	77.000000	71.8	11.0	6.53	2.01e-33	9.35	2.62e-46	0.97
chr19-3	chr19	46346947	46347107	+	6.05	0.784	78.000000	71.8	5.0	14.37	3.61e-55	7.98	1.08e-41	0.90
chr14-2	chr14	103562909	103563069	+	5.81	0.814	77.000000	68.1	11.0	6.19	5.23e-31	8.53	5.62e-42	0.89
chr16-59	chr16	67109876	67110036	+	5.81	0.777	76.000000	68.1	6.0	11.35	8.98e-47	8.94	2.68e-43	0.87
chr1-71	chr1	53220540	53220700	+	5.57	0.804	70.000000	65.3	14.0	4.66	4.03e-23	8.39	7.12e-40	0.86
chr17-22	chr17	58219173	58219333	+	5.57	0.790	73.000000	65.3	8.0	8.16	2.32e-36	9.10	4.46e-42	0.88
chr2-46	chr2	32039732	32039892	+	5.34	0.747	68.000000	62.5	9.0	6.94	6.66e-31	12.52	9.00e-49	0.90
chr18-2	chr18	56651221	56651381	+	5.18	0.745	66.000000	60.6	15.0	4.04	1.79e-18	7.03	8.30e-33	0.92
chr10-80	chr10	31318941	31319101	+	4.94	0.835	67.000000	58.8	12.0	4.90	1.28e-21	8.81	1.08e-36	0.99
chr13-23	chr13	94596112	94596272	+	4.62	0.770	61.000000	54.1	12.0	4.51	6.42e-19	9.35	8.90e-36	0.90
chr1-89	chr1	50960248	50960408	+	4.54	0.829	60.000000	53.2	13.0	4.09	7.60e-17	8.64	1.88e-33	0.90
chr6-7	chr6	166383053	166383213	+	4.38	0.709	56.000000	51.3	5.0	10.26	2.13e-33	7.12	2.73e-28	0.87
chr2-58	chr2	231786297	231786457	+	4.30	0.868	55.000000	50.4	10.0	5.04	1.85e-19	6.23	4.02e-25	0.89
chr11-13	chr11	47578914	47579074	+	4.30	0.855	56.000000	50.4	11.0	4.58	8.21e-18	7.27	3.19e-28	1.02
chr1-117	chr1	111140163	111140323	+	4.22	0.683	53.000000	49.4	7.0	7.06	4.48e-25	6.73	9.41e-26	0.88
chr14-5	chr14	60092021	60092181	+	4.22	0.837	55.000000	50.4	11.0	4.58	8.21e-18	6.58	8.95e-26	0.86
chr19-8	chr19	39435934	39436094	+	4.06	0.808	53.000000	47.6	10.0	4.76	2.21e-17	7.02	4.40e-26	0.92
chr17-34	chr17	32342153	32342313	+	3.98	0.857	52.000000	46.6	6.0	7.77	3.22e-25	7.36	1.68e-26	0.89
chr22-7	chr22	19432384	19432544	+	3.98	0.826	51.000000	46.6	8.0	5.83	2.56e-20	6.79	5.51e-25	0.93
chr10-114	chr10	93702582	93702742	+	3.90	0.833	49.000000	45.7	5.0	9.14	1.80e-27	6.76	1.95e-24	0.84
chr11-144	chr11	62591546	62591706	+	3.58	0.762	45.000000	42.0	10.0	4.20	1.78e-13	5.64	1.38e-19	0.86
chr15-11	chr15	23565545	23565705	+	3.58	0.818	48.000000	42.0	9.0	4.66	6.24e-15	6.08	2.09e-20	0.98
chr3-10	chr3	129439900	129440060	+	3.42	0.675	46.000000	41.0	9.0	4.56	6.24e-15	4.70	4.81e-16	0.93
chr11-186	chr11	112025298	112025458	+	3.42	0.790	44.000000	40.1	6.0	6.69	4.75e-20	12.40	9.48e-32	0.91
chr13-44	chr13	113208685	113208845	+	3.42	0.845	45.000000	40.1	4.0	10.03	3.01e-26	6.33	1.30e-20	0.96
chr11-287	chr11	65096030	65096190	+	3.34	0.788	42.000000	39.2	9.0	4.35	1.28e-13	6.97	1.12e-21	0.91
chr16-67	chr16	690363	690523	+	3.34	0.882	43.000000	39.2	7.0	5.60	4.92e-17	6.84	2.22e-21	0.91
chr19-15	chr19	7680793	7680953	+	3.34	0.831	42.000000	39.2	4.0	9.79	3.01e-25	5.64	2.09e-18	0.93
chr22-19	chr22	21982773	21982933	+	3.34	0.818	42.000000	39.2	5.0	7.84	6.86e-22	5.77	9.64e-19	0.91
chr2-103	chr2	241102268	241102428	+	3.27	0.733	41.000000	38.2	5.0	7.65	5.37e-21	5.51	1.18e-17	0.94
chr5-621	chr5	7972427	7972587	+	3.27	0.776	43.000000	39.2	7.0	5.60	4.92e-17	4.34	2.90e-14	0.94
chr3-13	chr3	51538544	51538704	+	3.19	0.833	40.000000	37.3	6.0	6.22	1.32e-17	5.79	5.45e-18	0.94
chr12-13	chr12	109052460	109052620	+	3.19	0.754	40.000000	37.3	8.0	4.66	8.00e-14	5.82	4.65e-18	0.92
chr17-51	chr17	82065801	82065961	+	3.11	0.911	40.000000	36.4	1.0	36.38	1.02e-42	6.17	1.74e-18	0.95
chrX-7	chrX	154411404	154411564	+	3.11	0.754	39.000000	36.4	8.0	4.55	3.73e-13	6.48	3.59e-19	0.95
chr3-16	chr3	185498922	185499082	+	2.87	0.772	38.000000	34.5	8.0	4.31	7.45e-12	4.09	5.38e-12	0.96
chr9-27	chr9	7799739	7799899	+	2.79	0.755	36.000000	32.6	7.0	4.66	4.85e-12	8.36	9.86e-21	1.03
chr17-57	chr17	81552403	81552563	+	2.79	0.809	37.000000	32.6	4.0	8.16	1.46e-18	4.89	1.75e-13	0.91
chr20-72	chr20	28640980	28641140	+	2.79	0.761	37.000000	32.6	5.0	6.53	7.02e-16	7.40	4.07e-19	1.11
chr10-162	chr10	104122077	104122237	+	2.71	0.737	36.000000	31.7	6.0	5.29	4.91e-13	4.69	5.38e-13	0.94
chr1-236	chr1	163321741	163321901	+	2.63	0.750	34.000000	30.8	5.0	6.16	2.82e-14	4.12	3.21e-11	0.91
chr7-78	chr7	91449299	91449459	+	2.63	0.725	34.000000	30.8	3.0	10.26	4.28e-20	4.86	4.59e-13	0.91
chrUn_KI270752v1-1	chrUn_KI270752v1	20588	20695	+	2.63	0.912	33.000000	30.8	4.0	7.70	9.13e-17	4033.38	1.52e-106	1.13
chr1-254	chr1	151865352	151865512	+	2.55	0.706	32.000000	29.8	6.0	4.97	1.29e-11	4.51	6.98e-12	0.86
chr4-126	chr4	55386091	55386251	+	2.55	0.709	33.000000	29.8	7.0	4.26	4.32e-10	4.89	8.76e-13	1.06
chr11-2078	chr11	59810745	59810905	+	2.55	0.696	32.000000	29.8	4.0	7.46	6.88e-16	4.27	2.68e-11	0.89
chr8-1686	chr8	94719769	94719929	+	2.47	0.833	34.000000	28.9	6.0	4.82	6.28e-11	5.56	7.76e-14	0.89
chr6-23	chr6	20118633	20118793	+	2.39	0.720	31.000000	28.0	4.0	7.00	3.53e-14	4.18	1.82e-10	0.89
chr13-82	chr13	16589805	16589965	+	2.39	0.886	31.000000	28.0	5.0	5.60	5.60e-12	26.19	7.32e-32	1.03
chrX-24	chrX	77433497	77433657	+	2.39	0.660	30.000000	28.0	3.0	9.33	3.90e-17	4.22	1.40e-10	0.95
chr4-160	chr4	79450266	79450426	+	2.31	0.805	30.000000	27.1	6.0	4.51	2.96e-10	4.51	6.37e-11	0.96
chr9-64	chr9	96807342	96807502	+	2.31	0.723	30.000000	27.1	6.0	4.51	2.96e-10	4.11	5.10e-10	0.92
chr12-33	chr12	33638201	33638361	+	2.31	0.846	30.000000	27.1	3.0	9.02	3.90e-17	4.66	2.94e-11	0.92
chr14-36	chr14	73829650	73829810	+	2.31	0.620	30.000000	27.1	4.0	6.76	3.53e-14	4.99	6.06e-12	0.96
chr21-396	chr21	39212336	39212496	+	2.31	0.620	30.000000	27.1	6.0	4.51	2.96e-10	4.24	2.57e-10	0.92
chr4-167	chr4	139248826	139248986	+	2.07	0.821	30.000000	24.3	5.0	4.85	8.07e-10	4.81	1.54e-10	0.93
chr5-2284	chr5	110607964	110608124	+	2.07	0.683	30.000000	24.3	6.0	4.04	2.48e-08	4.49	6.57e-10	0.93
