# Supplementary material for: Multi-Level Control of the ATM/ATR-CHK1 Axis by the Transcription Factor E4F1 in Triple-Negative Breast Cancer
Source: Int J Mol Sci. 2022 Aug 16;23(16):9217. doi: 10.3390/ijms23169217 (PMC9409040; doi:10.3390/ijms23169217)
Supplement: Supplementary file 1 [file ijms-23-09217-s001.zip › Supplementary Table S2.xlsx]

## Sheet: Feuil1
Chr	ChIP-Seq peakStart	End	Strand	Annotation	Distance to TSS	Nearest PromoterID	Entrez ID	Nearest Unigene	Nearest Refseq	Nearest Ensembl	Gene Name	Gene Alias	Gene Description	Gene Type
chr6	26596875	26597035	+	promoter-TSS (NM_013375)	12	NM_013375	29777	Hs.254406	NM_013375	ENSG00000146109	ABT1	Esf2|hABT1	activator of basal transcription 1	protein-coding
chr14	103562909	103563069	+	promoter-TSS (NM_032374)	32	NR_126431	84334	Hs.598441	NM_032374	ENSG00000256053	APOPT1	APOP|APOP1|C14orf153	apoptogenic 1, mitochondrial	protein-coding
chr15	100602332	100602492	+	promoter-TSS (NM_001352508)	-138	NM_024708	140460	Hs.31845	NM_024708	ENSG00000183475	ASB7	-	ankyrin repeat and SOCS box containing 7	protein-coding
chr16	67109876	67110036	+	promoter-TSS (NM_001320540)	-36	NM_025187	80262	Hs.513666	NM_025187	ENSG00000125149	C16orf70	C16orf6|LIN10|lin-10	chromosome 16 open reading frame 70	protein-coding
chr17	32342153	32342313	+	promoter-TSS (NM_022344)	-24	NM_022344	64149	Hs.655257	NM_022344	ENSG00000108666	C17orf75	NJMU-R1|SRI2	chromosome 17 open reading frame 75	protein-coding
chr1	53220540	53220700	+	promoter-TSS (NM_001304759)	19	NM_001304759	54987	Hs.525391	NM_017887	ENSG00000162384	C1orf123	-	chromosome 1 open reading frame 123	protein-coding
chr10	118754924	118755084	+	5' UTR (NM_153810, exon 1 of 9)	242	NM_153810	143384	Hs.420024	NM_153810	ENSG00000151893	CACUL1	C10orf46|CAC1	CDK2 associated cullin domain 1	protein-coding
chr13	26253997	26254157	+	promoter-TSS (NM_001318368)	-27	NM_001318368	1024	Hs.382306	NM_001260	ENSG00000132964	CDK8	K35	cyclin dependent kinase 8	protein-coding
chr11	125625831	125625991	+	promoter-TSS (NM_001274)	-313	NM_001330428	1111	Hs.24529	NM_001274	ENSG00000149554	CHEK1	CHK1	checkpoint kinase 1	protein-coding
chr19	16542405	16542565	+	promoter-TSS (NM_006387)	-33	NM_006387	10523	Hs.740364	NM_006387	ENSG00000085872	CHERP	DAN16|SCAF6|SRA1	calcium homeostasis endoplasmic reticulum protein	protein-coding
chr16	10944446	10944606	+	promoter-TSS (NM_015226)	38	NM_015226	23274	Hs.35490	NM_015226	ENSG00000038532	CLEC16A	Gop-1|KIAA0350	C-type lectin domain containing 16A	protein-coding
chr2	101252797	101252957	+	promoter-TSS (NM_017546)	-6	NM_017546	55571	Hs.744080	NM_017546	ENSG00000158435	CNOT11	C2orf29|C40	CCR4-NOT transcription complex subunit 11	protein-coding
chr2	231786297	231786457	+	promoter-TSS (NM_001282952)	-6	NM_001282950	64708	Hs.335061	NM_022730	ENSG00000144524	COPS7B	CSN7B|SGN7b	COP9 signalosome subunit 7B	protein-coding
chr16	85799495	85799655	+	promoter-TSS (NM_001318794)	8	NM_001318786	1327	Hs.433419	NM_001861	ENSG00000131143	COX4I1	COX IV-1|COX4|COX4-1|COXIV|COXIV-1	cytochrome c oxidase subunit 4I1	protein-coding
chr20	6005977	6006137	+	promoter-TSS (NM_019095)	-16	NM_001323563	54675	Hs.743956	NM_019095	ENSG00000088766	CRLS1	C20orf155|CLS|CLS1|GCD10|dJ967N21.6	cardiolipin synthase 1	protein-coding
chr20	37693925	37694085	+	promoter-TSS (NM_030877)	50	NM_001281495	56259	Hs.472667	NM_030877	ENSG00000132792	CTNNBL1	C20orf33|NAP|P14L|PP8304|dJ633O20.1	catenin beta like 1	protein-coding
chr13	113208685	113208845	+	promoter-TSS (NM_003589)	-7	NM_003589	8451	Hs.339735	NM_003589	ENSG00000139842	CUL4A	-	cullin 4A	protein-coding
chr1	160262457	160262617	+	promoter-TSS (NR_028103)	-9	NR_028103	50717	Hs.632447	NM_015726	ENSG00000132716	DCAF8	GAN2|H326|WDR42A	DDB1 and CUL4 associated factor 8	protein-coding
chr11	112025298	112025458	+	5' UTR (NM_001931, exon 1 of 14)	564	NM_001931	1737	Hs.335551	NM_001931	ENSG00000150768	DLAT	DLTA|PDC-E2|PDCE2	dihydrolipoamide S-acetyltransferase	protein-coding
chr9	7799739	7799899	+	promoter-TSS (NM_033428)	-13	NM_033428	90871	Hs.7517	NM_033428	ENSG00000137038	DMAC1	C9orf123|TMEM261	distal membrane arm assembly complex 1	protein-coding
chr7	726572	726732	+	promoter-TSS (NR_075098)	-49	NM_017802	54919	Hs.535896	NM_017802	ENSG00000164818	DNAAF5	CILD18|HEATR2	dynein axonemal assembly factor 5	protein-coding
chr3	180989659	180989819	+	promoter-TSS (NR_033722)	35	NR_033721	131118	Hs.230601	NM_145261	ENSG00000205981	DNAJC19	PAM18|TIM14|TIMM14	DnaJ heat shock protein family (Hsp40) member C19	protein-coding
chr10	73247253	73247413	+	promoter-TSS (NR_038373)	-2	NM_015190	23234	Hs.408577	NM_015190	ENSG00000213551	DNAJC9	HDJC9|JDD1|SB73	DnaJ heat shock protein family (Hsp40) member C9	protein-coding
chr1	101025744	101025904	+	promoter-TSS (NR_109849)	-18	NM_001077395	51611	Hs.440776	NM_015958	ENSG00000117543	DPH5	AD-018|CGI-30|HSPC143|NPD015	diphthamide biosynthesis 5	protein-coding
chr8	94719769	94719929	+	promoter-TSS (NM_181787)	-26	NM_181787	286148	Hs.567828	NM_181787	ENSG00000156162	DPY19L4	-	dpy-19 like 4	protein-coding
chr2	32039732	32039892	+	promoter-TSS (NM_032574)	23	NM_001321209	84661	Hs.531788	NM_032574	ENSG00000162961	DPY30	Cps25|HDPY-30|Saf19	dpy-30, histone methyltransferase complex regulatory subunit	protein-coding
chr1	111140163	111140323	+	promoter-TSS (NR_146304)	-27	NR_146305	128338	Hs.485606	NM_178454	ENSG00000156171	DRAM2	CORD21|PRO180|TMEM77|WWFQ154	DNA damage regulated autophagy modulator 2	protein-coding
chr17	82065801	82065961	+	promoter-TSS (NM_022156)	-60	NM_022156	64118	Hs.514599	NM_022156	ENSG00000169718	DUS1L	DUS1|PP3111	dihydrouridine synthase 1 like	protein-coding
chr16	2223518	2223678	+	5' UTR (NM_004424, exon 1 of 14)	110	NM_004424	1877	Hs.513268	NM_004424	ENSG00000167967	E4F1	E4F	E4F transcription factor 1	protein-coding
chr11	86245018	86245178	+	5' UTR (NM_001308007, exon 1 of 13)	714	NM_003797	8726	Hs.503510	NM_003797	ENSG00000074266	EED	COGIS|HEED|WAIT1	embryonic ectoderm development	protein-coding
chr11	62573829	62573989	+	promoter-TSS (NM_001404)	79	NM_001404	1937	Hs.144835	NM_001404	ENSG00000254772	EEF1G	EF1G|GIG35	eukaryotic translation elongation factor 1 gamma	protein-coding
chr22	36529168	36529328	+	promoter-TSS (NM_003753)	-18	NM_003753	8664	Hs.55682	NM_003753	ENSG00000100353	EIF3D	EIF3S7|eIF3-p66|eIF3-zeta	eukaryotic translation initiation factor 3 subunit D	protein-coding
chr8	28093034	28093194	+	promoter-TSS (NM_018091)	47	NM_018091	55140	Hs.491336	NM_018091	ENSG00000134014	ELP3	KAT9	elongator acetyltransferase complex subunit 3	protein-coding
chr1	220046601	220046761	+	promoter-TSS (NM_004446)	-23	NM_004446	2058	Hs.497788	NM_004446	ENSG00000136628	EPRS	EARS|GLUPRORS|PARS|PIG32|QARS|QPRS	glutamyl-prolyl-tRNA synthetase	protein-coding
chr17	81552403	81552563	+	promoter-TSS (NM_025161)	-80	NR_033338	80233	Hs.313905	NM_025161	ENSG00000185504	FAAP100	C17orf70	Fanconi anemia core complex associated protein 100	protein-coding
chr1	50960248	50960408	+	promoter-TSS (NM_007051)	-64	NM_007051	11124	Hs.530402	NM_007051	ENSG00000185104	FAF1	CGI-03|HFAF1s|UBXD12|UBXN3A|hFAF1	Fas associated factor 1	protein-coding
chr13	16589805	16589965	+	Intergenic	-1605412	NR_027278	26080	Hs.448583	NR_027278	ENSG00000279516	FAM230C	LINC00281|NCRNA00281	family with sequence similarity 230 member C	ncRNA
chrX	77433497	77433657	+	Intergenic	-14098	NM_003868	8823	Hs.666364	NM_003868	ENSG00000196468	FGF16	FGF-16|MF4	fibroblast growth factor 16	protein-coding
chr9	113221247	113221407	+	promoter-TSS (NM_015258)	34	NM_015258	23307	Hs.522351	NM_015258	ENSG00000119321	FKBP15	FKBP133|KIAA0674|PPP1R76	FK506 binding protein 15	protein-coding
chr9	105558035	105558195	+	promoter-TSS (NM_001351499)	-15	NR_147214	2218	Hs.55777	NM_006731	ENSG00000106692	FKTN	CMD1X|FCMD|LGMD2M|MDDGA4|MDDGB4|MDDGC4	fukutin	protein-coding
chr10	93702582	93702742	+	promoter-TSS (NR_144635)	-90	NR_144635	118924	Hs.586650	NM_145246	ENSG00000148690	FRA10AC1	C10orf4|F26C11.1-like|FRA10A	FRA10A associated CGG repeat 1	protein-coding
chr20	28640980	28641140	+	Intergenic	-38395	NR_132315	100289097	Hs.529357	NR_132315	ENSG00000282826	FRG1CP	-	FSHD region gene 1 family member C, pseudogene	pseudo
chr7	91449299	91449459	+	Intergenic	184911	NM_003505	8321	Hs.94234	NM_003505	ENSG00000157240	FZD1	-	frizzled class receptor 1	protein-coding
chr2	85561495	85561655	+	promoter-TSS (NM_001311312)	-41	NM_001142269	2677	Hs.77719	NM_000821	ENSG00000115486	GGCX	VKCFD1	gamma-glutamyl carboxylase	protein-coding
chr4	79450266	79450426	+	Intergenic	-42128	NM_033214	2712	Hs.98008	NM_033214	ENSG00000196475	GK2	GKP2|GKTA	glycerol kinase 2	protein-coding
chr3	52685868	52686028	+	promoter-TSS (NM_001350079)	28	NM_014366	26354	Hs.313544	NM_014366	ENSG00000163938	GNL3	C77032|E2IG3|NNP47|NS	G protein nucleolar 3	protein-coding
chr3	129439900	129440060	+	promoter-TSS (NM_018262)	-56	NM_052985	55764	Hs.655284	NM_018262	ENSG00000163913	IFT122	CED|CED1|SPG|WDR10|WDR10p|WDR140	intraflagellar transport 122	protein-coding
chr11	68903790	68903950	+	promoter-TSS (NM_002180)	19	NM_002180	3508	Hs.503048	NM_002180	ENSG00000132740	IGHMBP2	CATF1|CMT2S|HCSA|HMN6|SMARD1|SMUBP2|ZFAND7	immunoglobulin mu binding protein 2	protein-coding
chr16	47461116	47461276	+	promoter-TSS (NM_001305002)	78	NM_001305002	81533	Hs.42217	NM_030790	ENSG00000129636	ITFG1	2310047C21Rik|CDA08|LNKN-1|TIP	integrin alpha FG-GAP repeat containing 1	protein-coding
chr1	11926391	11926551	+	promoter-TSS (NM_138346)	-43	NM_138346	90231	Hs.520094	NM_138346	ENSG00000116685	KIAA2013	-	KIAA2013	protein-coding
chr15	51971744	51971904	+	promoter-TSS (NM_138792)	-23	NM_138792	123169	Hs.567662	NM_138792	ENSG00000166477	LEO1	RDL	LEO1 homolog, Paf1/RNA polymerase II complex component	protein-coding
chr14	73829650	73829810	+	intron (NR_135238, intron 1 of 1)	405	NR_135238	100506498	Hs.569330	NR_135238	ENSG00000258586	LINC02274	-	long intergenic non-protein coding RNA 2274	ncRNA
chr7	155644332	155644492	+	promoter-TSS (NM_053043)	-6	NR_126344	100506302	Hs.87856	NR_126344	ENSG00000216895	LOC100506302	-	uncharacterized LOC100506302	ncRNA
chr4	6673948	6674108	+	promoter-TSS (NR_134664)	-66	NR_015433	93622	Hs.6815	NM_138699	ENSG00000170846	LOC93622	-	Morf4 family associated protein 1 like 1 pseudogene	pseudo
chr6	20118633	20118793	+	intron (NM_001080480, intron 8 of 12)	93751	NR_073465	154141	Hs.377830	NM_001080480	ENSG00000172197	MBOAT1	LPEAT1|LPLAT|LPLAT 1|LPSAT|OACT1|dJ434O11.1	membrane bound O-acyltransferase domain containing 1	protein-coding
chr4	139248826	139248986	+	Intergenic	31432	NM_032623	84709	Hs.710036	NM_032623	ENSG00000137463	MGARP	C4orf49|CESP-1|HUMMR|OSAP	mitochondria localized glutamic acid rich protein	protein-coding
chr5	110607964	110608124	+	intron (NM_001039763, intron 8 of 13)	-94129	NR_031644	100302159		NR_031644	ENSG00000221436	MIR548F3	MIR548F-3|MIRN548F3|hsa-mir-548f-3	microRNA 548f-3	ncRNA
chr15	23565545	23565705	+	5' UTR (NM_005664, exon 1 of 1)	318	NM_005664	7681	Hs.72964	NM_005664	ENSG00000179455	MKRN3	CPPB2|D15S9|RNF63|ZFP127|ZNF127	makorin ring finger protein 3	protein-coding
chr17	58219173	58219333	+	promoter-TSS (NM_001330397)	52	NM_001321268	54903	Hs.408843	NM_017777	ENSG00000011143	MKS1	BBS13|JBTS28|MES|MKS|POC12	Meckel syndrome, type 1	protein-coding
chr6	166383053	166383213	+	promoter-TSS (NM_016098)	-120	NM_001270879	51660	Hs.172755	NM_016098	ENSG00000060762	MPC1	BRP44L|CGI-129|MPYCD|SLC54A1|dJ68L15.3	mitochondrial pyruvate carrier 1	protein-coding
chr4	6640564	6640724	+	5' UTR (NM_033296, exon 1 of 2)	553	NM_033296	93621	Hs.406590	NM_033296	ENSG00000179010	MRFAP1	PAM14|PGR1	Morf4 family associated protein 1	protein-coding
chr4	6709832	6709992	+	promoter-TSS (NM_203462)	-33	NM_203462	114932	Hs.593159	NM_152301	ENSG00000178988	MRFAP1L1	PP784	Morf4 family associated protein 1 like 1	protein-coding
chr11	59810745	59810905	+	promoter-TSS (NM_017840)	47	NM_017840	54948	Hs.530734	NM_017840	ENSG00000166902	MRPL16	L16mt|MRP-L16|PNAS-111	mitochondrial ribosomal protein L16	protein-coding
chr22	19432384	19432544	+	promoter-TSS (NM_003325)	-40	NM_001318151	64976	Hs.431307	NM_003776	ENSG00000185608	MRPL40	L40mt|MRP-L22|MRP-L40|MRPL22|NLVCF|URIM	mitochondrial ribosomal protein L40	protein-coding
chr2	223957342	223957502	+	promoter-TSS (NM_022915)	18	NM_022915	65080	Hs.203559	NM_022915	ENSG00000135900	MRPL44	COXPD16|L44MT|MRP-L44	mitochondrial ribosomal protein L44	protein-coding
chr2	241102268	241102428	+	promoter-TSS (NM_001330180)	-16	NR_138466	130916	Hs.159556	NM_182501	ENSG00000122085	MTERF4	MTERFD2	mitochondrial transcription termination factor 4	protein-coding
chr5	7972427	7972587	+	Intergenic	103403	NR_134480	4552	Hs.481551	NM_002454	ENSG00000124275	MTRR	MSR|cblE	5-methyltetrahydrofolate-homocysteine methyltransferase reductase	protein-coding
chr16	740956	741116	+	promoter-TSS (NM_001304799)	2	NM_001304799	64428	Hs.513247	NM_022493	ENSG00000103245	NARFL	HPRN|IOP1|LET1L|NAR1|PRN	nuclear prelamin A recognition factor like	protein-coding
chr20	46089934	46090094	+	promoter-TSS (NM_020967)	-73	NM_001348150	57727	Hs.654991	NM_020967	ENSG00000124160	NCOA5	CIA|bA465L10.6	nuclear receptor coactivator 5	protein-coding
chr11	47578914	47579074	+	promoter-TSS (NM_001318725)	-16	NM_004551	4722	Hs.502528	NM_004551	ENSG00000213619	NDUFS3	CI-30	NADH:ubiquinone oxidoreductase core subunit S3	protein-coding
chr17	7329353	7329513	+	promoter-TSS (NM_032442)	-114	NM_032442	84461	Hs.654794	NM_032442	ENSG00000215041	NEURL4	-	neuralized E3 ubiquitin protein ligase 4	protein-coding
chr4	87422489	87422649	+	promoter-TSS (NM_001248011)	-7	NM_024047	53343	Hs.149500	NM_024047	ENSG00000170502	NUDT9	NUDT10	nudix hydrolase 9	protein-coding
chr10	49941927	49942087	+	promoter-TSS (NM_001324381)	20	NM_001324381	8505	Hs.535298	NM_003631	ENSG00000227345	PARG	PARG99	poly(ADP-ribose) glycohydrolase	protein-coding
chr10	45972360	45972520	+	promoter-TSS (NR_029388)	-12	NR_029388	728407	Hs.499594	NR_029388		PARGP1	-	poly(ADP-ribose) glycohydrolase pseudogene 1	pseudo
chr14	60092021	60092181	+	5' UTR (NM_001330177, exon 1 of 11)	190	NM_022495	64430	Hs.509499	NM_022495	ENSG00000126773	PCNX4	C14orf135|FBP2|PCNXL4	pecanex homolog 4	protein-coding
chr6	107459505	107459665	+	promoter-TSS (NM_020381)	-10	NM_020381	57107	Hs.745008	NM_020381	ENSG00000164494	PDSS2	C6orf210|COQ10D3|DLP1|bA59I9.3|hDLP1	decaprenyl diphosphate synthase subunit 2	protein-coding
chr1	77219374	77219534	+	promoter-TSS (NM_005482)	-7	NM_005482	10026	Hs.178305	NM_005482	ENSG00000142892	PIGK	GPI8	phosphatidylinositol glycan anchor biosynthesis class K	protein-coding
chr1	88684147	88684307	+	promoter-TSS (NM_001320707)	83	NM_006256	5586	Hs.440833	NM_006256	ENSG00000065243	PKN2	PAK2|PRK2|PRKCL2|PRO2042|Pak-2|STK7	protein kinase N2	protein-coding
chr19	46346947	46347107	+	promoter-TSS (NM_006247)	33	NM_001204284	5536	Hs.654604	NM_006247	ENSG00000011485	PPP5C	PP5|PPP5|PPT	protein phosphatase 5 catalytic subunit	protein-coding
chr17	4796052	4796212	+	promoter-TSS (NM_002798)	-12	NM_002798	5694	Hs.77060	NM_002798	ENSG00000142507	PSMB6	DELTA|LMPY|Y	proteasome subunit beta 6	protein-coding
chr21	39212336	39212496	+	intron (NM_018963, intron 34 of 41)	-28902	NM_001261824	8624	Hs.473838	NM_003720	ENSG00000183527	PSMG1	C21LRP|DSCR2|LRPC21|PAC-1|PAC1	proteasome assembly chaperone 1	protein-coding
chr12	949748	949908	+	promoter-TSS (NR_123713)	-106	NR_123713	5893	Hs.410355	NM_134422	ENSG00000002016	RAD52	-	RAD52 homolog, DNA repair protein	protein-coding
chr3	51538544	51538704	+	promoter-TSS (NM_001322253)	-59	NM_001322256	23132	Hs.105399	NM_015106	ENSG00000164080	RAD54L2	ARIP4|HSPC325|SRISNF2L	RAD54 like 2	protein-coding
chr14	35809243	35809403	+	promoter-TSS (NM_001283043)	0	NM_001346243	253959	Hs.113150	NM_014990	ENSG00000174373	RALGAPA1	GARNL1|GRIPE|RalGAPalpha1|TULIP1|p240	Ral GTPase activating protein catalytic alpha subunit 1	protein-coding
chr1	163321741	163321901	+	promoter-TSS (NR_045630)	-30	NM_001254748	8490	Hs.24950	NM_003617	ENSG00000143248	RGS5	MST092|MST106|MST129|MSTP032|MSTP092|MSTP106|MSTP129	regulator of G protein signaling 5	protein-coding
chr19	39435934	39436094	+	promoter-TSS (NM_001321111)	6	NM_001321111	6217	Hs.397609	NM_001020	ENSG00000105193	RPS16	S16	ribosomal protein S16	protein-coding
chr2	3575082	3575242	+	promoter-TSS (NM_001011)	-101	NM_001011	6201	Hs.534346	NM_001011	ENSG00000171863	RPS7	DBA8|S7|eS7	ribosomal protein S7	protein-coding
chr15	72118279	72118439	+	promoter-TSS (NM_145204)	69	NM_001172111	123228	Hs.513002	NM_145204	ENSG00000166192	SENP8	DEN1|NEDP1|PRSC2	SUMO peptidase family member, NEDD8 specific	protein-coding
chr10	104122077	104122237	+	promoter-TSS (NM_145247)	-14	NM_001002759	119392	Hs.93667	NM_145247	ENSG00000156384	SFR1	C10orf78|MEI5|MEIR5|bA373N18.1	SWI5 dependent homologous recombination repair protein 1	protein-coding
chr4	55386091	55386251	+	promoter-TSS (NR_037969)	-591	NR_037969	100506462	Hs.718667	NR_037969	ENSG00000249700	SRD5A3-AS1	-	SRD5A3 antisense RNA 1	ncRNA
chr20	58651107	58651267	+	promoter-TSS (NM_003763)	-66	NR_037942	8675	Hs.307913	NM_003763	ENSG00000124222	STX16	SYN16	syntaxin 16	protein-coding
chr12	33638201	33638361	+	Intergenic	-198462	NM_198992	341359	Hs.118703	NM_198992	ENSG00000110975	SYT10	-	synaptotagmin 10	protein-coding
chr10	103367829	103367989	+	promoter-TSS (NM_139052)	-44	NM_139052	6877	Hs.96103	NM_006951	ENSG00000148835	TAF5	TAF(II)100|TAF2D|TAFII-100|TAFII100	TATA-box binding protein associated factor 5	protein-coding
chrX	154411404	154411564	+	promoter-TSS (NM_001303465)	-34	NM_000116	6901	Hs.409911	NM_000116	ENSG00000102125	TAZ	BTHS|CMD3A|EFE|EFE2|G4.5|LVNCX|Taz1	tafazzin	protein-coding
chr13	94596112	94596272	+	promoter-TSS (NR_130731)	83	NM_014305	23483	Hs.12393	NM_014305	ENSG00000088451	TGDS	CATMANS|SDR2E1|TDPGD	TDP-glucose 4,6-dehydratase	protein-coding
chr1	151865352	151865512	+	Intergenic	-11735	NM_182578	284486	Hs.132648	NM_182578	ENSG00000196407	THEM5	ACOT15	thioesterase superfamily member 5	protein-coding
chr3	185498922	185499082	+	promoter-TSS (NM_080652)	55	NM_080652	90407	Hs.677570	NM_080652	ENSG00000163900	TMEM41A	2900010K02Rik	transmembrane protein 41A	protein-coding
chr7	22822784	22822944	+	promoter-TSS (NM_019059)	-12	NM_019059	54543	Hs.112318	NM_019059	ENSG00000196683	TOMM7	TOM7	translocase of outer mitochondrial membrane 7	protein-coding
chr22	21982773	21982933	+	promoter-TSS (NM_001349851)	-10	NR_146277	8940	Hs.436401	NM_003935	ENSG00000100038	TOP3B	TOP3B1	DNA topoisomerase III beta	protein-coding
chr19	7680793	7680953	+	promoter-TSS (NM_174894)	52	NM_001042462	126003	Hs.432413	NM_174894	ENSG00000181029	TRAPPC5	TRS31	trafficking protein particle complex 5	protein-coding
chr3	12484380	12484540	+	promoter-TSS (NM_025265)	28	NM_001145393	80746	Hs.335550	NM_025265	ENSG00000154743	TSEN2	PCH2B|SEN2|SEN2L	tRNA splicing endonuclease subunit 2	protein-coding
chr8	33513086	33513246	+	promoter-TSS (NM_025115)	19	NM_025115	80185	Hs.77135	NM_025115	ENSG00000129696	TTI2	C8orf41|MRT39	TELO2 interacting protein 2	protein-coding
chr6	112087479	112087639	+	promoter-TSS (NM_016262)	-11	NM_016262	51175	Hs.34851	NM_016262	ENSG00000074935	TUBE1	TUBE|dJ142L7.2	tubulin epsilon 1	protein-coding
chr11	62591546	62591706	+	promoter-TSS (NM_022830)	11	NM_022830	64852	Hs.728983	NM_022830	ENSG00000149016	TUT1	PAPD2|RBM21|STARPAP|TENT1|TUTase|URLC6	terminal uridylyl transferase 1, U6 snRNA-specific	protein-coding
chr12	109052460	109052620	+	promoter-TSS (NM_032663)	-30	NM_032663	84749	Hs.486434	NM_032663	ENSG00000135093	USP30	-	ubiquitin specific peptidase 30	protein-coding
chr1	209827849	209828009	+	promoter-TSS (NM_014388)	-38	NM_014388	27042	Hs.194754	NM_014388	ENSG00000117597	UTP25	C1orf107|DEF|DIEXF|DJ434O14.5	UTP25, small subunit processor component	protein-coding
chr11	65096030	65096190	+	promoter-TSS (NM_013265)	-5	NM_013265	738	Hs.277517	NM_013265	ENSG00000149823	VPS51	ANG2|ANG3|C11orf2|C11orf3|FFR	VPS51, GARP complex subunit	protein-coding
chr16	690363	690523	+	promoter-TSS (NM_032259)	-19	NM_032259	84219	Hs.459632	NM_032259	ENSG00000127580	WDR24	C16orf21|JFP7	WD repeat domain 24	protein-coding
chr18	56651221	56651381	+	promoter-TSS (NM_052834)	-84	NM_052834	23335	Hs.465213	NM_015285	ENSG00000091157	WDR7	TRAG	WD repeat domain 7	protein-coding
chr10	31318941	31319101	+	promoter-TSS (NM_001323655)	74	NR_148978	220930	Hs.372654	NR_024284	ENSG00000237036	ZEB1-AS1	-	ZEB1 antisense RNA 1	ncRNA
chr5	140700330	140700490	+	promoter-TSS (NM_144723)	50	NM_144723	153527	Hs.350194	NM_144723	ENSG00000146007	ZMAT2	Ptg-12|Snu23	zinc finger matrin-type 2	protein-coding
chr4	141220830	141220990	+	promoter-TSS (NM_014487)	23	NM_001292002	27309	Hs.120766	NM_014487	ENSG00000109445	ZNF330	HSA6591|NOA36	zinc finger protein 330	protein-coding
chr9	96807342	96807502	+	Intergenic	-29293	NM_001314060	22869	Hs.75264	NM_014930	ENSG00000081386	ZNF510	-	zinc finger protein 510	protein-coding
chr7	149838280	149838440	+	promoter-TSS (NM_001099220)	-7	NM_001099220	643641	Hs.731923	NM_001099220	ENSG00000106479	ZNF862	-	zinc finger protein 862	protein-coding
chr1	85708414	85708574	+	promoter-TSS (NM_001170670)	-61	NM_017953	54680	Hs.5111	NM_017953	ENSG00000117174	ZNHIT6	BCD1|C1orf181|NY-BR-75	zinc finger HIT-type containing 6	protein-coding
chrUn_KI270752v1	20588	20695	+	NA	NA	NA
