# Supplementary material for: Multi-Level Control of the ATM/ATR-CHK1 Axis by the Transcription Factor E4F1 in Triple-Negative Breast Cancer
Source: Int J Mol Sci. 2022 Aug 16;23(16):9217. doi: 10.3390/ijms23169217 (PMC9409040; doi:10.3390/ijms23169217)
Supplement: Supplementary file 1 [file ijms-23-09217-s001.zip › supplementary Table S3.xlsx]

## Sheet: Feuil1
Annotation	Number of peaks	Total size (bp)	Log2 Enrichment
3UTR	0.0	22924774	-6.845
miRNA	0.0	95572	-6.845
ncRNA	0.0	6761450	-6.845
TTS	0.0	31381780	-6.845
pseudo	0.0	1961750	-6.845
Exon	0.0	36382413	-6.845
Intron	4.0	1246050094	-3.564
Intergenic	10.0	1645830153	-2.643
Promoter	94.0	35056978	6.142
5UTR	7.0	2783389	6.050
snoRNA	0.0	357	-6.845
scRNA	0.0	97	-6.845
rRNA	0.0	26339	-6.845
Annotation	Number of peaks	Total size (bp)	Log2 Enrichment
3UTR	0.0	22924774	-6.858
Retroposon	0.0	4060591	-6.858
RC?	0.0	59630	-6.858
RNA	0.0	107936	-6.858
miRNA	0.0	95572	-6.858
ncRNA	0.0	6761450	-6.858
TTS	0.0	31381780	-6.858
LINE	2.0	627429912	-3.586
srpRNA	0.0	262414	-6.858
SINE	1.0	378049612	-3.855
RC	0.0	359714	-6.858
tRNA	0.0	91450	-6.858
DNA?	0.0	422563	-6.858
pseudo	0.0	1961750	-6.858
DNA	0.0	99145748	-6.858
Exon	0.0	36382413	-6.858
Intron	4.0	650637581	-2.638
Intergenic	3.0	749639773	-3.258
Promoter	94.0	35056978	6.130
5UTR	7.0	2783389	6.038
snoRNA	0.0	357	-6.858
LTR?	0.0	1139363	-6.858
scRNA	0.0	121903	-6.858
CpG-Island	0.0	9109524	-6.858
Low_complexity	0.0	5406856	-6.858
LTR	3.0	257983302	-1.719
Simple_repeat	1.0	33876005	-0.375
snRNA	0.0	312412	-6.858
Unknown	0.0	713706	-6.858
SINE?	0.0	2674	-6.858
Satellite	1.0	74138439	-1.505
rRNA	0.0	198846	-6.858
