# Supplementary material for: Multi-Level Control of the ATM/ATR-CHK1 Axis by the Transcription Factor E4F1 in Triple-Negative Breast Cancer
Source: Int J Mol Sci. 2022 Aug 16;23(16):9217. doi: 10.3390/ijms23169217 (PMC9409040; doi:10.3390/ijms23169217)
Supplement: Supplementary file 1 [file ijms-23-09217-s001.zip › Supplementary Table S4.xlsx]

## Sheet: Feuil1
chr	start	end	EntrezGene cisG	distance to TSS	Gene NAME	ANNOTATION
chr1	74871516	74871681	12570	-30004	AC139023.2	N/A
chr1	39592423	39592797	52846	-47	CNOT11 / D1BWG0212E	CCR4-NOT transcription complex subunit
chr1	174078125	174078325	98193	-90	DCAF8	DDB1 and CUL4 associated factor 8 Gene [Source:MGI Symbol;Acc:MGI:91860]
chr1	194956254	194956650	215193	62	DIEXF homolog / AA408296	expressed sequence AA408296 Gene [Source:MGI Symbol;Acc:MGI:2138080]
chr1	173290825	173291131	68874	50	KLHDC9	kelch domain containing 9 Gene [Source:MGI Symbol;Acc:MGI:1916124]
chr1	4775608	4775994	27395	34	MRPL15	mitochondrial ribosomal protein L15 Gene [Source:MGI Symbol;Acc:MGI:1351639]
chr10	80084854	80085473	103236	-419	CSNK1G2	casein kinase 1, gamma 2 Gene [Source:MGI Symbol;Acc:MGI:1920014]
chr10	38853515	38853971	66337	35	FAM229B/ 1700025K23RIK	RIKEN cDNA 1700025K23 gene Gene [Source:MGI Symbol;Acc:MGI:1913587]
chr10	62041005	62041469	72320	14	KIF1-binding protein / 2510003E04RIK	RIKEN cDNA 2510003E04 gene Gene [Source:MGI Symbol;Acc:MGI:1919570]
chr10	42941064	42941452	71365	-295	PDSS2	prenyl (solanesyl) diphosphate synthase, subunit 2 Gene [Source:MGI Symbol;Acc:MGI:1918615]
chr10	99949976	99950285	237500	160	TMTC3	transmembrane and tetratricopeptide repeat containing 3 Gene [Source:MGI Symbol;Acc:MGI:3036255]
chr10	38853546	38853928	66337	37	TUBE1	epsilon-tubulin 1 Gene [Source:MGI Symbol;Acc:MGI:1919174]
chr11	72609499	72609768	192986	83	CYB5D2	cytochrome b5 domain containing 2 Gene [Source:MGI Symbol;Acc:MGI:2684848]
chr11	120239899	120240309	71885	156	FAAP100 2310003H01RIK	RIKEN cDNA 2310003H01 gene Gene [Source:MGI Symbol;Acc:MGI:1919135] / Fanconi associated protein 100
chr11	87666673	87666797	380718	9	MKS1	Meckel syndrome, type 1 Gene [Source:MGI Symbol;Acc:MGI:3584243]
chr11	69714931	69715489	216860	-160	NEURL4	neuralized homolog 4 (Drosophila) Gene [Source:MGI Symbol;Acc:MGI:1921092]
chr11	70338609	70339023	19175	-24	PSMB6	proteasome (prosome, macropain) subunit, beta type 6 Gene [Source:MGI Symbol;Acc:MGI:104880]
chr11	115489510	115489885	67283	251	SLC25A19	solute carrier family 25 (mitochondrial thiamine pyrophosphate carrier), member 19 Gene [Source:MGI Symbol;Acc:MGI:1914533]
chr11	72609437	72609798	192986	77	ZZEF1	zinc finger, ZZ-type with EF hand domain 1 Gene [Source:MGI Symbol;Acc:MGI:2444286]
chr12	112951288	112951660	70369	13	BAG5	BCL2-associated athanogene 5 Gene [Source:MGI Symbol;Acc:MGI:1917619]
chr12	32036199	32036564	13382	106	DLD	dihydrolipoamide dehydrogenase Gene [Source:MGI Symbol;Acc:MGI:107450]
chr12	86311652	86312029	73736	-43	FCF1	FCF1 small subunit (SSU) processome component homolog (S. cerevisiae) Gene [Source:MGI Symbol;Acc:MGI:1920986]
chr12	56921988	56922311	56784	-17	RALGAPA1	Ral GTPase activating protein, alpha subunit 1 Gene [Source:MGI Symbol;Acc:MGI:1931050]
chr12	81269334	81269703	12192	55520	STRM	striamin Gene [Source:MGI Symbol;Acc:MGI:1343201]
chr13	13981830	13982160	97884	-64954	B3GALNT2	UDP-GalNAc:betaGlcNAc beta 1,3-galactosaminyltransferase, polypeptide 2 Gene [Source:MGI Symbol;Acc:MGI:2145517]
chr14	21207959	21208325	108671	36	DNAJC9	DnaJ (Hsp40) homolog, subfamily C, member 9 Gene [Source:MGI Symbol;Acc:MGI:1915326]
chr14	66211728	66212082	74195	43	ELP3	elongation protein 3 homolog (S. cerevisiae) Gene [Source:MGI Symbol;Acc:MGI:1921445]
chr14	31832172	31832469	66923	10	GNL3	guanine nucleotide binding protein-like 3 (nucleolar) Gene [Source:MGI Symbol;Acc:MGI:1353651]
chr14	49791683	49792056	70646	-63	NAA30 / NAT12	N(alpha)-acetyltransferase 30, NatC catalytic subunit Gene [Source:MGI Symbol;Acc:MGI:1922259]
chr14	33015026	33015230	26430	-28	PARG	poly (ADP-ribose) glycohydrolase Gene [Source:MGI Symbol;Acc:MGI:1347094]
chr14	31832134	31832439	30877	13	PBRM1	polybromo 1 Gene [Source:MGI Symbol;Acc:MGI:1923998]
chr14	118531825	118532190	76355	87	TGDS	TDP-glucose 4,6-dehydratase Gene [Source:MGI Symbol;Acc:MGI:1923605]
chr15	77800878	77801427	55944	-42	EIF3D	eukaryotic translation initiation factor 3, subunit D Gene [Source:MGI Symbol;Acc:MGI:1933181]
chr15	101903931	101904359	75705	-8326	EIF4B	eukaryotic translation initiation factor 4B Gene [Source:MGI Symbol;Acc:MGI:95304]
chr16	10545315	10545631	74374	-4	CLEC16A	C-type lectin domain family 16, member A Gene [Source:MGI Symbol;Acc:MGI:1921624]
chr16	14159242	14159526	223989	75	MARF1 / 4921513D23RIK	RIKEN cDNA 4921513D23 gene Gene [Source:MGI Symbol;Acc:MGI:2444505]
chr16	57231375	57231681	67581	-46	TBC1D23	TBC1 domain family, member 23 Gene [Source:MGI Symbol;Acc:MGI:1914831]
chr17	8476286	8476751	55951	-176	BRP44L	brain protein 44-like Gene [Source:MGI Symbol;Acc:MGI:1915240]
chr17	8476461	8476696	55951	-99	BRP44L	brain protein 44-like Gene [Source:MGI Symbol;Acc:MGI:1915240]
chr17	74715623	74715906	28536	-7509	DPY30	dpy-30 homolog (C. elegans) Gene [Source:MGI Symbol;Acc:MGI:1913560]
chr17	24592058	24592395	13560	-24	E4F1	E4F transcription factor 1 Gene [Source:MGI Symbol;Acc:MGI:109530]
chr17	71342161	71342278	67938	2365	MYL12B	myosin, light chain 12B, regulatory Gene [Source:MGI Symbol;Acc:MGI:107494]
chr17	25910493	25910921	67563	-33	NARFL	nuclear prelamin A recognition factor-like Gene [Source:MGI Symbol;Acc:MGI:1914813]
chr18	52625109	52625440	67222	-72	SRFBP1	serum response factor binding protein 1 Gene [Source:MGI Symbol;Acc:MGI:1914472]
chr18	63868157	63868478	53382	16305	WDR7	WD repeat domain 7 Gene [Source:MGI Symbol;Acc:MGI:1860197]
chr18	5591552	5591867	21417	-200	ZEB1	zinc finger E-box binding homeobox 1 Gene [Source:MGI Symbol;Acc:MGI:1344313]
chr18	36953381	36953749	66492	-1	ZMAT2	zinc finger, matrin type 2 Gene [Source:MGI Symbol;Acc:MGI:1913742]
chr19	60656584	60656996	78832	-48	CACUL1 / 2700078E11RIK	RIKEN cDNA 2700078E11 gene Gene [Source:MGI Symbol;Acc:MGI:1926082] / CDK2-associated and cullin domain-containing protein 1
chr19	9041459	9041807	67160	100	EEF1G	eukaryotic translation elongation factor 1 gamma Gene [Source:MGI Symbol;Acc:MGI:1914410]
chr19	47141968	47142397	226182	-46	TAF5	TAF5 RNA polymerase II, TATA box binding protein (TBP)-associated factor Gene [Source:MGI Symbol;Acc:MGI:2442144]
chr2	132672152	132672698	66586	-30	CRLS1	cardiolipin synthase 1 Gene [Source:MGI Symbol;Acc:MGI:1913836]
chr2	157562892	157563362	66642	-57	CTNNBL1	catenin, beta like 1 Gene [Source:MGI Symbol;Acc:MGI:1913892]
chr2	94018971	94019262	56348	21052	HSD17B12	hydroxysteroid (17-beta) dehydrogenase 12 Gene [Source:MGI Symbol;Acc:MGI:1926967]
chr2	152512784	152512991	66405	17	MCTS2	malignant T cell amplified sequence 2 Gene [Source:MGI Symbol;Acc:MGI:1913655]
chr2	164860164	164860592	228869	101	NCOA5	nuclear receptor coactivator 5 Gene [Source:MGI Symbol;Acc:MGI:2385165]
chr2	83484588	83484758	69082	-61	ZC3H15	zinc finger CCCH-type containing 15 Gene [Source:MGI Symbol;Acc:MGI:1919747]
chr3	33980068	33980446	67713	13	DNAJC19	DnaJ (Hsp40) homolog, subfamily C, member 19 Gene [Source:MGI Symbol;Acc:MGI:1914963]
chr3	115590864	115591245	69740	-24	DPH5 / A930005H10RIK	DPH5 homolog (S. cerevisiae) Gene [Source:MGI Symbol;Acc:MGI:1916990]
chr3	106350482	106350897	99712	-12	DRAM2	VDNA-damage regulated autophagy modulator 2 Gene [Source:MGI Symbol;Acc:MGI:1914421]
chr3	89802479	89802839	23897	21	HAX1	HCLS1 associated X-1 Gene [Source:MGI Symbol;Acc:MGI:1346319]
chr3	152376850	152377221	329777	-36	PIGK	phosphatidylinositol glycan anchor biosynthesis, class K Gene [Source:MGI Symbol;Acc:MGI:1913863]
chr3	142544774	142545145	109333	-22	PKN2	protein kinase N2 Gene [Source:MGI Symbol;Acc:MGI:109211]
chr3	145238934	145239423	229937	-36	ZNHIT6	zinc finger, HIT type 6 Gene [Source:MGI Symbol;Acc:MGI:1916996]
chr4	74924000	74924382	66928	19	C9orf123 homolog / 3110001D03RIK	RIKEN cDNA 3110001D03 gene Gene [Source:MGI Symbol;Acc:MGI:1914178] : humanC9orf123 homolog
chr4	135543019	135543272	66193	-29	Pithd1 / 1110049F12RIK	RIKEN cDNA 1110049F12 gene Gene [Source:MGI Symbol;Acc:MGI:1913443] / PITH domain-containing protein 1
chr4	107562296	107562580	74098	-54	Czib / 0610037L13RIK /	RIKEN cDNA 0610037L13 gene Gene [Source:MGI Symbol;Acc:MGI:1921348] / Czib
chr4	141279188	141279587	68817	63	DDI2	DNA-damage inducible protein 2 Gene [Source:MGI Symbol;Acc:MGI:1917244]
chr4	109349008	109349287	14084	-92	FAF1	Fas-associated factor 1 Gene [Source:MGI Symbol;Acc:MGI:109419]
chr4	62021392	62021704	20529	-226	FKBP15	FK506 binding protein 15 Gene [Source:MGI Symbol;Acc:MGI:2444782]
chr4	53726834	53727238	246179	-26	FKTN	fukutin Gene [Source:MGI Symbol;Acc:MGI:2179507]
chr4	147314858	147315123	77034	-9	KIAA2013 precursor / 2510039O18RIK	RIKEN cDNA 2510039O18 gene Gene [Source:MGI Symbol;Acc:MGI:1924284]
chr4	123395233	123395631	595136	35	NDUFS5	NADH dehydrogenase (ubiquinone) Fe-S protein 5 Gene [Source:MGI Symbol;Acc:MGI:1890889]
chr5	147042534	147042957	264064	-512	CDK8	cyclin-dependent kinase 8 Gene [Source:MGI Symbol;Acc:MGI:1196224]
chr5	139625983	139626285	433956	-51	HEATR2	HEAT repeat containing 2 Gene [Source:MGI Symbol;Acc:MGI:3616079]
chr5	37187840	37188227	67568	71	MRFAP1	Morf4 family associated protein 1 Gene [Source:MGI Symbol;Acc:MGI:1914818]
chr5	135845616	135846018	100609	11	NSUN5	NOL1/NOP2/Sun domain family, member 5 Gene [Source:MGI Symbol;Acc:MGI:2140844]
chr5	104475680	104476047	74167	-150	NUDT9	nudix (nucleoside diphosphate linked moiety X)-type motif 9 Gene [Source:MGI Symbol;Acc:MGI:1921417]
chr5	28643380	28643637	381626	-181	RBM33	RNA binding motif protein 33 Gene [Source:MGI Symbol;Acc:MGI:1919670]
chr5	23349816	23350168	66169	51	TOMM7	translocase of outer mitochondrial membrane 7 homolog (yeast) Gene [Source:MGI Symbol;Acc:MGI:1913419]
chr6	119852468	119852898	19365	-43	4930540M05RIK	RIKEN cDNA 4930540M05 gene Gene [Source:MGI Symbol;Acc:MGI:2148236]
chr6	91827803	91828210	232236	-29	Ccdc174 / C130022K22RIK	RIKEN cDNA C130022K22 gene Gene [Source:MGI Symbol;Acc:MGI:2444652] / Coiled-coil domain-containing protein 174
chr6	50516595	50516884	13063	249	crooked neck-like protein 1 / 5430402O13RIK	RIKEN cDNA 5430402O13 gene Gene [Source:MGI Symbol;Acc:MGI:1918631]
chr6	72364117	72364433	56316	-38	GGCX	gamma-glutamyl carboxylase Gene [Source:MGI Symbol;Acc:MGI:1927655]
chr6	148779774	148780229	320727	42	IPO8	importin 8 Gene [Source:MGI Symbol;Acc:MGI:2444611]
chr6	145159515	145159876	67636	-2	LYRM5	LYR motif containing 5 Gene [Source:MGI Symbol;Acc:MGI:1914886]
chr6	48454164	48454453	76252	-33305	RP24-124B23.1	N/A
chr6	115494474	115494891	381802	-35	TSEN2	tRNA splicing endonuclease 2 homolog (S. cerevisiae) Gene [Source:MGI Symbol;Acc:MGI:2141599]
chr7	97128964	97129303	13626	-368	EED	embryonic ectoderm development Gene [Source:MGI Symbol;Acc:MGI:95286]
chr7	17612953	17613374	19060	-61	PPP5C	protein phosphatase 5, catalytic subunit Gene [Source:MGI Symbol;Acc:MGI:102666]
chr7	29135649	29135846	100039355	-17	RPS16	ribosomal protein S16 Gene [Source:MGI Symbol;Acc:MGI:98118]
chr7	29135561	29135804	20055	-25	RPS16	40S ribosomal protein S16 [Source:UniProtKB/Swiss-Prot;Acc:P14131]
chr8	107748866	107749258	234678	-149	C16orf70 homolog / D230025D16RIK	RIKEN cDNA D230025D16 gene Gene [Source:MGI Symbol;Acc:MGI:2443049]
chr8	74998845	74999278	27967	-46	CHERP	calcium homeostasis endoplasmic reticulum protein Gene [Source:MGI Symbol;Acc:MGI:106417]
chr8	14888816	14889006	26889	404	CLN8	ceroid-lipofuscinosis, neuronal 8 Gene [Source:MGI Symbol;Acc:MGI:1349447]
chr8	123191790	123192131	18117	-64	COX4NB	COX4 neighbor Gene [Source:MGI Symbol;Acc:MGI:1343095]
chr8	24367389	24367787	57437	57	GOLGA7	golgi autoantigen, golgin subfamily a, 7 Gene [Source:MGI Symbol;Acc:MGI:1931029]
chr8	88364496	88365071	71927	2	ITFG1	integrin alpha FG-GAP repeat containing 1 Gene [Source:MGI Symbol;Acc:MGI:106419]
chr8	73196952	73197328	50783	35	LSM4	LSM4 homolog, U6 small nuclear RNA associated (S. cerevisiae) Gene [Source:MGI Symbol;Acc:MGI:1354692]
chr8	113618389	113618657	319518	-121	PDPR	pyruvate dehydrogenase phosphatase regulatory subunit Gene [Source:MGI Symbol;Acc:MGI:2442188]
chr8	3676352	3676630	66682	21	TRAPPC5	trafficking protein particle complex 5 Gene [Source:MGI Symbol;Acc:MGI:1913932]
chr8	32260576	32260915	234138	-35	TTI2 / TELO2-interacting protein 2	cDNA sequence BC019943 Gene [Source:MGI Symbol;Acc:MGI:2384576] / TELO2-interacting protein 2
chr9	36534041	36534431	12649	42	CHEK1	checkpoint kinase 1 homolog (S. pombe) Gene [Source:MGI Symbol;Acc:MGI:1202065]
chr9	3403895	3404229	244672	-36	CWF19L2	CWF19-like 2, cell cycle control (S. pombe) Gene [Source:MGI Symbol;Acc:MGI:1918023]
chr9	50467466	50467862	235339	-241	DLAT	dihydrolipoamide S-acetyltransferase (E2 component of pyruvate dehydrogenase complex) Gene [Source:MGI Symbol;Acc:MGI:2385311]
chr9	20411781	20412290	66662	138	Fbxl12os / 5730577I03RIK	RIKEN cDNA 5730577I03 gene Gene [Source:MGI Symbol;Acc:MGI:1913912]
chr9	75289176	75289514	235497	-11	LEO1	Leo1, Paf1/RNA polymerase II complex component, homolog (S. cerevisiae) Gene [Source:MGI Symbol;Acc:MGI:2685031]
chr9	70351412	70351768	93836	69	RNF111	ring finger 111 Gene [Source:MGI Symbol;Acc:MGI:1934919]
chr9	59598355	59598725	71599	107	SENP8	SUMO/sentrin specific peptidase 8 Gene [Source:MGI Symbol;Acc:MGI:1918849]
chrX	71527899	71528202	66826	-62	DNASE1L1	deoxyribonuclease 1-like 1 Gene [Source:MGI Symbol;Acc:MGI:109628]
