# Supplementary material for: Multi-Level Control of the ATM/ATR-CHK1 Axis by the Transcription Factor E4F1 in Triple-Negative Breast Cancer
Source: Int J Mol Sci. 2022 Aug 16;23(16):9217. doi: 10.3390/ijms23169217 (PMC9409040; doi:10.3390/ijms23169217)
Supplement: Supplementary file 1 [file ijms-23-09217-s001.zip › Supplementary Table S5.xlsx]

## Sheet: Feuil1
Gene Name	Gene Description
C1orf123	chromosome 1 open reading frame 123
DCAF8	DDB1 and CUL4 associated factor 8
DPH5	diphthamide biosynthesis 5
DRAM2	DNA damage regulated autophagy modulator 2
FAF1	Fas associated factor 1
KIAA2013	KIAA2013
PKN2	protein kinase N2
ZNHIT6	zinc finger HIT-type containing 6
CACUL1	CDK2 associated cullin domain 1
PARG	poly(ADP-ribose) glycohydrolase
TAF5	TATA-box binding protein associated factor 5
CHEK1	checkpoint kinase 1
DLAT	dihydrolipoamide S-acetyltransferase
EED	embryonic ectoderm development
EEF1G	eukaryotic translation elongation factor 1 gamma
CDK8	cyclin dependent kinase 8
RALGAPA1	Ral GTPase activating protein catalytic alpha subunit 1
LEO1	LEO1 homolog, Paf1/RNA polymerase II complex component
SENP8	SUMO peptidase family member, NEDD8 specific
C16orf70	chromosome 16 open reading frame 70
CLEC16A	C-type lectin domain containing 16A
COX4I1	cytochrome c oxidase subunit 4I1
E4F1	E4F transcription factor 1
ITFG1	integrin alpha FG-GAP repeat containing 1
NARFL	nuclear prelamin A recognition factor like
FAAP100	Fanconi anemia core complex associated protein 100
MKS1	Meckel syndrome, type 1
NEURL4	neuralized E3 ubiquitin protein ligase 4
PSMB6	proteasome subunit beta 6
WDR7	WD repeat domain 7
CHERP	calcium homeostasis endoplasmic reticulum protein
PPP5C	protein phosphatase 5 catalytic subunit
TRAPPC5	trafficking protein particle complex 5
CNOT11	CCR4-NOT transcription complex subunit 11
DPY30	dpy-30, histone methyltransferase complex regulatory subunit
GGCX	gamma-glutamyl carboxylase
CRLS1	cardiolipin synthase 1
CTNNBL1	catenin beta like 1
NCOA5	nuclear receptor coactivator 5
EIF3D	eukaryotic translation initiation factor 3 subunit D
GNL3	G protein nucleolar 3
TSEN2	tRNA splicing endonuclease subunit 2
MRFAP1	Morf4 family associated protein 1
NUDT9	nudix hydrolase 9
ZMAT2	zinc finger matrin-type 2
MPC1	mitochondrial pyruvate carrier 1
PDSS2	decaprenyl diphosphate synthase subunit 2
TUBE1	tubulin epsilon 1
TOMM7	translocase of outer mitochondrial membrane 7
ELP3	elongator acetyltransferase complex subunit 3
TTI2	TELO2 interacting protein 2
FKBP15	FK506 binding protein 15
FKTN	fukutin
DNAJC19	DnaJ Heat Shock Protein Family (Hsp40) Member C19
DNAJC9	DnaJ Heat Shock Protein Family (Hsp40) Member C9
PIGK	Phosphatidylinositol Glycan Anchor Biosynthesis Class K
RPS16	Ribosomal Protein S16
TGDS	TDP-Glucose 4,6-Dehydratase
